# Supplementary material
Source: PubMed Central journal article supplement (PMC4034230)
Supplement: 1406635111_pnas.201406635SI.pdf [file 1406635111_pnas.201406635SI.pdf]

# Supporting Information

Wang et al. 10.1073/pnas.1406635111

## SI Materials and Methods

**Complementation Analysis.** For complementation of *cdkc;2-3*, a 5.9-kb genomic DNA fragment containing the cyclin-dependent kinase C (*CDKC;2*) gene was amplified from cosmid clone JA-TY49B16 by PCR. This fragment was cloned into the BamHI/SacI sites of the pCambia1300 vector alone or as a C-terminal translational fusion to generate pCambia-*pCDKC;2::CDKC;2-HA* and pCambia-*pCDKC;2::CDKC;2-FLAG*. Mutant plants were transformed using *Agrobacterium tumefaciens* strain GV3101 carrying various *CDKC;2* constructs via the standard floral dipping method. Primary transformants were selected on germination media (GM) plates containing 25 µg/mL hygromycin (Sigma).

**FLOWERING LOCUS C-Terminator Exchange Construct.** For cloning of *FLOWERING LOCUS C (FLC)*-terminator exchange (*TEX*), *FLC* was cloned as a genomic SacI fragment (~12 kb) that comprises ~6 kb of the genomic sequence of the *FLC* gene with its flanking natural 5' (~3.5 kb) and 3' (~2.6 kb) sequences. Using PCR, an *EheI* site was introduced into the *FLC* sequence TAGCCACC containing the *FLC* translational stop TAG codon. An *SspI-SspI* fragment containing the *Arabidopsis rbc3B* (*At5G38410*) terminator (706 bp) was PCR amplified and cloned in the sense direction between the *EheI* and *SwaI* restriction sites. This fragment replaced the *FLC* 3' terminator region using the endogenous *SwaI* site located 741 bp downstream of the TAG translation stop of *FLC*. Therefore, the *FLC-TEX* construct contains a 12-kb *FLC* genomic DNA fragment composed of the promoter region, gene body, and replacement of the 3' region by *rbc3B* terminator (Fig. 4B). The *FLC-TEX* construct was transformed into the *FRI flc-2* genotype carrying a rearrangement/deletion allele of *FLC*. A representative *FLC-TEX* line (no. 577) was selected and crossed in *cdkc;2-2* with endogenous active *FLC*.

**Expression Analysis Using Real-Time RT-PCR.** Samples from plants grown in long days (16/8 h photoperiod) were harvested, and total RNA was extracted. Then, 2.5 µg of RNA was treated with TURBO DNase (Invitrogen) and used for cDNA synthesis (SUPERSCRIPT first STRAND RT-PCR SYSTEM; Invitrogen). cDNA was diluted and used for quantitative PCR using a Roche Lightcycler 480 and SYBR Green Master Mix. *UBC21* (*AT5G25760*) was used as a reference gene for normalization. Values are means derived from three biological repeats ± SEM. All of the primers used in the RT-PCR are listed in Table S1.

**Measurement of the COOLAIR Levels in Different Genetic Backgrounds.** The expression levels of polyadenylated *COOLAIR* were measured as previously reported (1). Briefly, the total RNA was reverse transcribed using a mixture of oligo d(T), set 6 new LP, polyA set1 LP, and polyA set4 LP primers (Table S1) (polyA set1 LP and polyA set4 LP are specific for certain proximal and distal polyadenylation sites). The cDNA was then used to determine the level of proximal polyadenylated, distal polyadenylated and total *FLC* antisense through qPCR. The proximal and distal polyadenylated *COOLAIR* are presented as relative to the total *COOLAIR* (Fig. 4) or as normalized to *UBC21* (Fig S6). To measure the total *FLC* antisense levels (polyadenylation and splicing independent) in *FLC-TEX* and the corresponding control (Col, *flc-2*), total RNA was reverse transcribed using *UBC21* RP and DTA RT primer (Table S1), which is specific to the antisense *FLC* region in both endogenous *FLC* and *FLC-TEX*. The cDNA was then used for qPCR with primer DTA LP + RP (Table S1)

and *UBC21* RP + LP. *UBC21* was used as a reference gene for normalization.

**ChIP Assays.** Seedlings were grown on GM plates at 23–25 °C with a photoperiod of 16 h light and 8 h dark for 2 wk before collecting. Two grams of plant tissue was cross-linked with formaldehyde for 15 min by vacuum infiltration, followed by the addition of glycine to 125 mM with another 5 min of vacuum infiltration. ChIP was performed as described in ref. 2 with minor modifications. After being ground into fine powder, plants were suspended in 30 mL of buffer [20 mM Hepes, 0.44 M sucrose, 1.25% (wt/vol) ficoll, 2.5% (wt/vol) Dextran T40, 10 mM MgCl<sub>2</sub>, 0.5% Triton X-100, 5 mM DTT, 1× protease inhibitor mixture (Roche Applied Science)], filtered twice through two layers of Miracloth, and centrifuged at 3,200 × g for 15 min. For histone ChIP and *CDKC2-HA* ChIP, nuclear pellets were resuspended in Nuclei Lysis Buffer [50 mM Tris-HCl (pH 8.0), 10 mM EDTA, 1% SDS, 1× protease inhibitor mixture] and sonicated with ten 30-s-long pulses (30-s intervals) using a Diagenode Bioruptor (high setting). Immunoprecipitation was performed using 30 µL of Dynabeads protein A (Invitrogen) and the appropriate antibody at 4 °C overnight. Immunoprecipitated DNA was eluted after reverse cross-linking by boiling at 95 °C for 10 min followed by treatment with 40 µg of proteinase K for 1 h at 48 °C. Samples were treated with StrataClean resin (Agilent Technologies). Then, 5 µL of anti-Histone H3 antibody (ab1791; Abcam), H3K4me2 antibody (07–030; Millipore), and H3Ac antibody (06–599; Millipore) or 5 µL of anti-HA antibody (ab9110; Abcam) was used for each immunoprecipitation (IP) reaction. Values are means ± SEM from three biological repeats; data are presented as a ratio of (modified histone level at *FLC*/H3 *FLC*) to (modified histone level at *Actin*/H3 *Actin*) to minimize the error generated when handling different tubes (Actin levels at position +55 post-transcription start site are used for normalization). *Actin*, *STM*, and *IGN5* are used as the internal controls and demonstrate the dynamic range of the ChIP assay. ChIP efficiencies ranged from 2% to 30% of input.

In the polymerase II (Pol II) ChIP, the nuclear pellet was resuspended in 1 mL of TAP buffer [100 mM NaCl, 20 mM Tris (pH 7.5), 2.5 mM EDTA, 10% (vol/vol) Glycerol, 1% Triton X-100, 1× protease inhibitor mixture] and given 20 strokes in a Dounce homogenizer. The resulting solution was sonicated 40× (15 s on/45 s off, low setting; Diagenode Bioruptor). Then, 250 µL of the supernatant were used for each IP together with 50 µL of Dynabeads protein G and 10 µg of anti-Ser<sup>2</sup> P C-terminal domain (CTD) (3E10; Active Motif) or anti-CTD (4H8, ab5408; Abcam). The IP reaction was performed with rotation for 4 h at 4 °C, and beads were washed 2 × 15 min with low salt wash buffer [150 mM NaCl, 20 mM Tris (pH 7.5), 2.5 mM EDTA, 0.05% Na-deoxycholate, 1% Triton X-100, 1× protease inhibitor], 2 × 15 min with high salt wash buffer [500 mM NaCl, 20 mM Tris (pH 7.5), 2.5 mM EDTA, 0.05% Na-deoxycholate, 1% Triton X-100, 1× protease inhibitor], 1 × 15 min with LiCl Wash buffer [250 mM LiCl, 20 mM Tris (pH 7.5), 2.5 mM EDTA, 0.5% Na-deoxycholate, 0.5% Nonidet P-40, 1× protease inhibitor] (for 4H8 only), and 1 × 15 min with TE buffer [10 mM Tris (pH 7.5), 1 mM EDTA]. The resulting DNA was recovered in the same way as for histone ChIP. Values are means ± SEM from two biological repeats; data are presented as ration of (Pol II *FLC*/input *FLC*) to (Pol II *Actin*/input *Actin*) to remove between-tube variation (Actin level at position +55 post-transcription start site was used for the

normalization). *Actin*, *STM*, and *IGN5* are used as the internal controls and demonstrate the dynamic range of the ChIP assay. ChIP efficiencies ranged from 0.3% of Input (3E10) to 2% of Input (4H8).

**Western Blotting.** Seedlings were grown on GM agar plates at 23–25 °C with a 16-h photoperiod for 2 wk. One gram of seedlings from wild-type, mutants, or transgenic plants was harvested and ground to fine powder in liquid nitrogen. Total protein was extracted by protein extraction buffer [50 mM Tris-HCl (pH 8.0), 50 mM NaCl, 10 mM EDTA, 2% (wt/vol) SDS, 1× protease inhibitor mixture (Roche Applied Science)]. The samples were centrifuged twice at 14,000 × *g* at 4 °C for 20 min. Protein samples were separated by SDS/PAGE and transferred onto a PVDF (polyvinylidenedifluoride) membrane (GE Healthcare). The samples were analyzed by Western blotting using anti-FLAG (F3165; Sigma), anti-HA (ab9110; Abcam), anti-Ser<sup>2</sup> P CTD (3E10; Active Motif), anti-CTD [8WG16] (ab817; Abcam), anti-Histone H3 (ab1791; Abcam), and anti-FCA (3), and visualized by chemiluminescence using Immobilon Chemiluminescent HRP substrate (Thermo Fisher Scientific).

**CDKC2 Purification for Proteomic Analysis.** Seedlings (10 g, fresh weight) grown in GM media for 2 wk under long day conditions were frozen and ground using liquid nitrogen in a mortar, and thawed into 10 mL of TAP buffer containing 150 mM NaCl, 20 mM Tris-HCl (pH 8), 2.5 mM EDTA, 0.5% Triton X-100, 5% (vol/vol) Glycerol, and 1× protease inhibitor mixture (Roche Applied Science). Proteins were extracted on a rotating platform for 30 min at 4 °C and centrifuged twice at 20,000 × *g* for 15 min at 4 °C. Centrifuged extracts were incubated with 70 μL of ANTI-FLAG M2 Magnetic Beads (M8823; Sigma) for 2 h at 4 °C and washed two times with TAP buffer without Triton X-100. They were then eluted with 100 μL of 1× FLAG (F3290; Sigma) solution (200 μg/mL) according to the manufacturer's instructions.

**Liquid Chromatography-Tandem Mass Spectrometry Analysis.** CDKC2-FLAG and control samples were cut from SDS/PAGE gels and washed, reduced, and alkylated, and treated with trypsin according to standard procedures. Peptides were extracted with 5% formic acid/50% acetonitrile, dried down, and redissolved in 0.1% TFA. For liquid chromatography-tandem mass spectrometry (LC-MS/MS) analysis (4), a sample aliquot was applied via a nanoAcquity (Waters) UPLC-system running at a flow rate of 250 nL·min<sup>-1</sup> to an LTQ-Orbitrap mass spectrometer (Thermo Fisher). Peptides were trapped using a precolumn (Symmetry C18, 5 μm, 180 μm × 20 mm; Waters), which was then switched in-line to an analytical column

(BEH C18, 1.7 μm, 75 μm × 250 mm; Waters) for separation. Peptides were eluted with a gradient of 3–37% (vol/vol) acetonitrile in water/0.1% formic acid at a rate of 0.5% min<sup>-1</sup>. The column was connected to a 10-μm SilicaTip nanospray emitter (New Objective) attached to a nanospray interface (Proxeon) for infusion into the mass spectrometer. The mass spectrometer was operated in positive ion mode at a capillary temperature of 200 °C. The source voltage and focusing voltages were tuned for the transmission of MRFA peptide (*m/z* 524) (Sigma-Aldrich). Data-dependent analysis was carried out in orbitrap-IT parallel mode using CID fragmentation on the five most abundant ions in each cycle. The orbitrap was run with a resolution of 30,000 over the MS range from *m/z* 350 to *m/z* 1,800 and an MS target of 10<sup>6</sup> and 1 s maximum scan time. Collision energy was 35, and an isolation width of 2 was used. Only monoisotopic 2<sup>+</sup> and 3<sup>+</sup> charged precursors were selected for MS2. The MS2 was triggered by a minimal signal of 1,000 with an AGC target of 3 × 10<sup>4</sup> ions and 150-ms scan time using the chromatography function for peak apex detection. Dynamic exclusion was set to 1 count and 30 s exclusion with an exclusion mass window of ±20 ppm. MS scans were saved in profile mode whereas MSMS scans were saved in centroid mode.

Alternatively, samples were analyzed by LC-MS/MS using a Synapt G2 HDMS mass spectrometer (Waters). The LC conditions were the same as described above, except that a longer gradient was used (0.33% min<sup>-1</sup> acetonitrile from 3% to 37%). The mass spectrometer was run in positive sensitivity mode using data-independent MS<sup>E</sup> ion mobility TOF. The collision energy (transfer cell) was optimized using a lookup table. The mass spectrometer was calibrated with sodium iodide, and the lock mass option was used with glufibrinogen peptide (Sigma) as calibrant.

Raw files from the orbitrap were processed with MaxQuant version 1.3.0.5 (4) (<http://maxquant.org>) to generate recalibrated peaklist files whereas raw files from the Synapt G2 were processed in PLGS (Waters). All generated peaklist files were used for database searches using an in-house Mascot 2.4 Server (Matrix Science Limited). The searches were performed on the TAIR\_10\_pep\_20101214.fasta database and on a common contaminants database using trypsin/P with two missed cleavages, carbamidomethylation (C) as fixed, and oxidation (M), acetylation (protein N terminus), and phosphorylation (STY) as variable modifications. Mass tolerances were 6 ppm for parent ions and 0.6 Da for fragment ions for Orbitrap data, and 20 ppm (parent) and 0.1 Da (fragments) for Synapt data. Mascot search results were imported and evaluated in Scaffold 3.6.4 ([www.proteomesoftware.com](http://www.proteomesoftware.com)), resulting in a false discovery rate of 0% for both peptides and proteins.

1. Liu FQ, et al. (2007) The *Arabidopsis* RNA-binding protein FCA requires a lysine-specific demethylase 1 homolog to downregulate *FLC*. *Mol Cell* 28(3):398–407.  
2. Wierzbicki AT, Haag JR, Pikaard CS (2008) Noncoding transcription by RNA polymerase Pol IVb/Pol V mediates transcriptional silencing of overlapping and adjacent genes. *Cell* 135(4):635–648.

3. Quesada V, Macknight R, Dean C, Simpson GG (2003) Autoregulation of FCA pre-mRNA processing controls *Arabidopsis* flowering time. *EMBO J* 22(12):3142–3152.  
4. Cox J, Mann M (2008) MaxQuant enables high peptide identification rates, individualized p.p.b.-range mass accuracies and proteome-wide protein quantification. *Nat Biotechnol* 26(12):1367–1372.

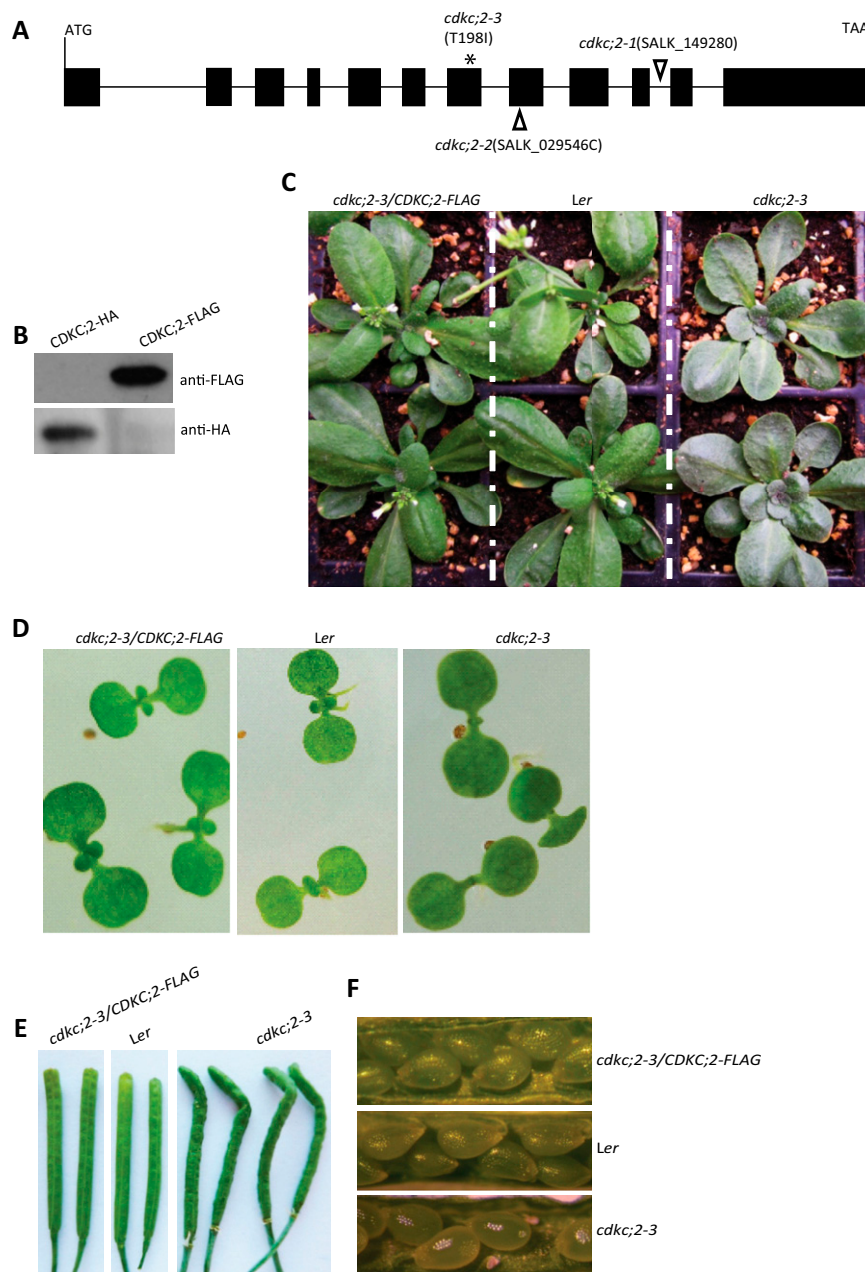

**Fig. 51.** Characterization of *cdkc;2*. (A) Schematic diagram showing the positions of the transferred DNA insertions or nucleotide change at the *CDKC;2* locus. Black rectangles represent exons. (B) Detection of CDKC;2-FLAG and CDKC;2-HA proteins in transgenic *Arabidopsis* plants. CDKC;2 proteins were detected by Western blotting of samples immunoprecipitated by anti-FLAG and anti-HA antibody from extracts from the transgenic plants. (C) *cdkc;2-3* has gray leaves compared with wild-type *Ler*. (D) *cdkc;2-3* grows slightly slower than wild type (*Ler*). (E) *cdkc;2-3* has curved siliques compared with wild type (*Ler*) in ~85% of homozygous progeny. (F) *cdkc;2-3* causes abortion in a small number of seeds. The phenotype could be the result of defective male or female gametes or defective embryo development.

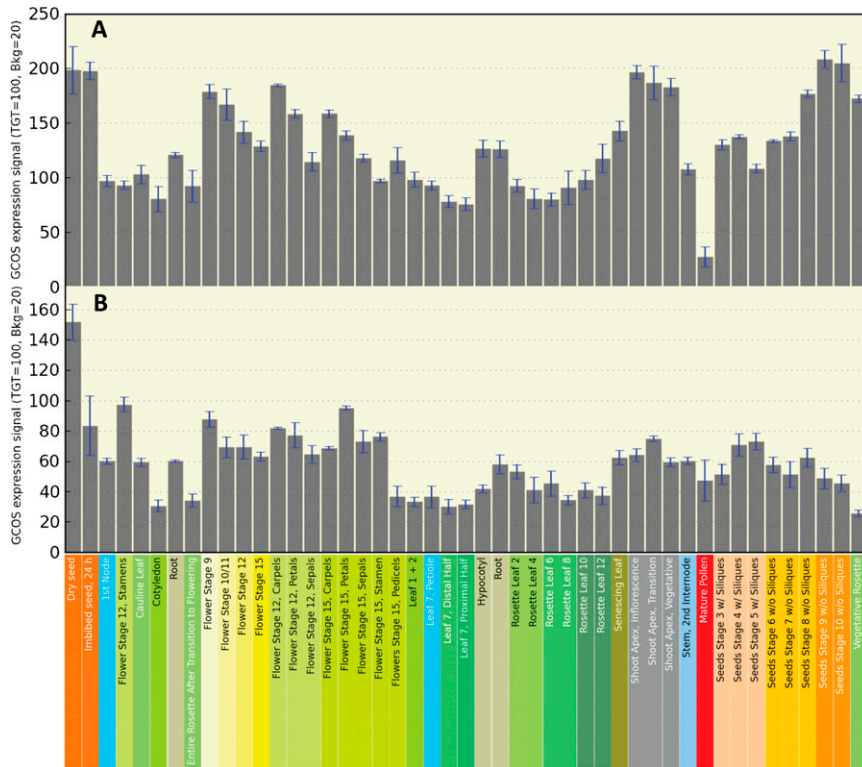

**Fig. S2.** Expression patterns for *CDKC2* (A) and *CDKC1* (B). Gene-expression data were downloaded from The Arabidopsis Information Resource (TAIR) Web site (*CDKC2*; <http://bbc.botany.utoronto.ca/efp/cgi-bin/efpWeb.cgi?primaryGene=AT5G64960&modelInput=Absolute>; *CDKC1*; <http://bbc.botany.utoronto.ca/efp/cgi-bin/efpWeb.cgi?primaryGene=AT5G10270&modelInput=Absolute>).

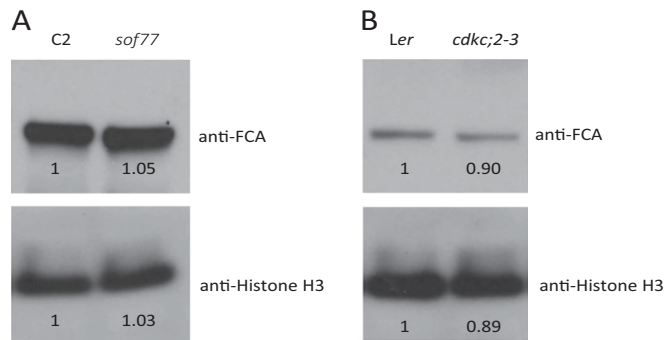

**Fig. S3.** (A) Detection of the FCA protein in C2 progenitor line and *sof77*. (B) Detection of the FCA protein in *Ler* and *cdkc;2-3*. FCA was detected by Western blotting of samples immunoprecipitated by anti-FCA antibody from extracts from leaves. Histone H3 was used as loading control.

**A**

|                                                  |                                                                                                                          |
|--------------------------------------------------|--------------------------------------------------------------------------------------------------------------------------|
| CDKC;2 and CDKC;1( <i>Arabidopsis thaliana</i> ) | <b>G</b> N <b>L</b> T <b>N</b> R <b>V</b> I <b>T</b> L <b>W</b> Y <b>R</b> P <b>P</b> E <b>L</b> L <b>L</b> G <b>A</b> T |
| CDKC;2 and CDKC;1( <i>Oryza sativa</i> )         | <b>G</b> N <b>L</b> T <b>N</b> R <b>V</b> I <b>T</b> L <b>W</b> Y <b>R</b> P <b>P</b> E <b>L</b> L <b>L</b> G <b>S</b> T |
| CTK1 ( <i>Saccharomyces cerevisiae</i> )         | <b>A</b> D <b>Y</b> T <b>N</b> R <b>V</b> I <b>T</b> L <b>W</b> Y <b>R</b> P <b>P</b> E <b>L</b> L <b>L</b> G <b>T</b> T |
| BUR1 ( <i>S. cerevisiae</i> )                    | <b>A</b> K <b>Y</b> T <b>S</b> V <b>V</b> T <b>R</b> W <b>Y</b> R <b>A</b> P <b>E</b> L <b>V</b> L <b>G</b> D <b>K</b>   |
| CDK12 ( <i>Homo sapiens</i> )                    | <b>R</b> P <b>Y</b> T <b>N</b> K <b>V</b> I <b>T</b> L <b>W</b> Y <b>R</b> P <b>P</b> E <b>L</b> L <b>L</b> G <b>E</b> E |
| CDK9 ( <i>H. sapiens</i> )                       | <b>N</b> R <b>Y</b> T <b>N</b> R <b>V</b> T <b>L</b> W <b>Y</b> R <b>P</b> P <b>E</b> L <b>L</b> L <b>G</b> E <b>R</b>   |

**B**

|            |                                                                                                                                                                                                                                                                                                                                         |     |
|------------|-----------------------------------------------------------------------------------------------------------------------------------------------------------------------------------------------------------------------------------------------------------------------------------------------------------------------------------------|-----|
| CDKC;1 1   | <b>M</b> A <b>M</b> A <b>S</b> F <b>G</b> Q <b>L</b> N <b>L</b> E <b>P</b> P <b>I</b> W <b>G</b> S <b>R</b> S <b>V</b> D <b>C</b> F <b>E</b> K <b>L</b> E <b>Q</b> I <b>G</b> E <b>G</b> T <b>Y</b> G <b>Q</b> V <b>M</b> A <b>K</b> E <b>I</b> K <b>T</b> G <b>E</b> I <b>V</b> A <b>L</b> K <b>K</b> I <b>R</b> M <b>D</b>            | 60  |
| CDKC;2 1   | <b>M</b> A <b>A</b> A <b>F</b> G <b>Q</b> L <b>N</b> L <b>E</b> P <b>P</b> I <b>W</b> G <b>S</b> R <b>S</b> V <b>D</b> C <b>F</b> E <b>K</b> L <b>E</b> Q <b>I</b> G <b>E</b> G <b>T</b> Y <b>G</b> Q <b>V</b> M <b>A</b> K <b>E</b> I <b>K</b> T <b>G</b> E <b>I</b> V <b>A</b> L <b>K</b> K <b>I</b> R <b>M</b> D                     | 60  |
| CDKC;1 61  | <b>N</b> E <b>R</b> E <b>G</b> F <b>P</b> I <b>T</b> A <b>R</b> E <b>I</b> K <b>I</b> L <b>K</b> L <b>H</b> H <b>E</b> N <b>V</b> I <b>Q</b> L <b>K</b> E <b>I</b> V <b>T</b> S <b>P</b> G <b>R</b> D <b>R</b> D <b>D</b> Q <b>G</b> K <b>P</b> D <b>N</b> N <b>K</b> Y <b>K</b> G <b>G</b> I <b>Y</b> M <b>V</b> F <b>E</b> Y          | 120 |
| CDKC;2 61  | <b>N</b> E <b>R</b> E <b>G</b> F <b>P</b> I <b>T</b> A <b>R</b> E <b>I</b> K <b>I</b> L <b>K</b> L <b>H</b> H <b>E</b> N <b>V</b> I <b>H</b> L <b>K</b> E <b>I</b> V <b>T</b> S <b>P</b> G <b>R</b> D <b>R</b> D <b>D</b> Q <b>G</b> K <b>P</b> D <b>N</b> N <b>K</b> Y <b>K</b> G <b>G</b> I <b>Y</b> M <b>V</b> F <b>E</b> Y          | 120 |
| CDKC;1 121 | <b>M</b> D <b>H</b> D <b>L</b> T <b>G</b> L <b>A</b> D <b>R</b> P <b>L</b> R <b>F</b> T <b>V</b> P <b>Q</b> I <b>K</b> C <b>Y</b> M <b>K</b> Q <b>L</b> L <b>T</b> G <b>L</b> H <b>Y</b> C <b>H</b> V <b>N</b> Q <b>V</b> L <b>H</b> R <b>D</b> I <b>K</b> S <b>N</b> L <b>L</b> I <b>D</b> N <b>E</b> G <b>N</b> L <b>K</b> L          | 180 |
| CDKC;2 121 | <b>M</b> D <b>H</b> D <b>L</b> T <b>G</b> L <b>A</b> D <b>R</b> P <b>L</b> R <b>F</b> T <b>V</b> P <b>Q</b> I <b>K</b> C <b>Y</b> M <b>K</b> Q <b>L</b> L <b>T</b> G <b>L</b> H <b>Y</b> C <b>H</b> V <b>N</b> Q <b>V</b> L <b>H</b> R <b>D</b> I <b>K</b> S <b>N</b> L <b>L</b> I <b>D</b> N <b>E</b> G <b>N</b> L <b>K</b> L          | 180 |
| CDKC;1 181 | <b>A</b> D <b>F</b> G <b>L</b> A <b>R</b> S <b>Y</b> S <b>H</b> D <b>H</b> T <b>G</b> N <b>L</b> T <b>N</b> R <b>V</b> I <b>T</b> L <b>W</b> Y <b>R</b> P <b>P</b> E <b>L</b> L <b>G</b> A <b>T</b> K <b>Y</b> G <b>P</b> A <b>I</b> D <b>M</b> S <b>V</b> G <b>C</b> I <b>F</b> A <b>E</b> L <b>L</b> H <b>A</b> K <b>P</b> I          | 240 |
| CDKC;2 181 | <b>A</b> D <b>F</b> G <b>L</b> A <b>R</b> S <b>Y</b> S <b>H</b> D <b>H</b> T <b>G</b> N <b>L</b> T <b>N</b> R <b>V</b> I <b>T</b> L <b>W</b> Y <b>R</b> P <b>P</b> E <b>L</b> L <b>G</b> A <b>T</b> K <b>Y</b> G <b>P</b> A <b>I</b> D <b>M</b> S <b>V</b> G <b>C</b> I <b>F</b> A <b>E</b> L <b>L</b> N <b>G</b> K <b>P</b> I          | 240 |
| CDKC;1 241 | <b>L</b> P <b>G</b> K <b>N</b> E <b>Q</b> L <b>N</b> K <b>I</b> F <b>E</b> L <b>C</b> G <b>S</b> P <b>D</b> E <b>K</b> L <b>W</b> P <b>G</b> V <b>S</b> K <b>M</b> P <b>W</b> F <b>N</b> F <b>K</b> P <b>A</b> R <b>L</b> P <b>K</b> R <b>R</b> V <b>R</b> E <b>F</b> F <b>R</b> H <b>F</b> D <b>R</b> H <b>A</b> L <b>E</b>            | 300 |
| CDKC;2 241 | <b>L</b> P <b>G</b> K <b>T</b> E <b>N</b> E <b>Q</b> L <b>N</b> K <b>I</b> F <b>E</b> L <b>C</b> G <b>S</b> P <b>D</b> E <b>S</b> N <b>W</b> P <b>G</b> V <b>S</b> K <b>M</b> P <b>W</b> N <b>Q</b> M <b>K</b> S <b>S</b> R <b>L</b> P <b>K</b> R <b>R</b> V <b>R</b> E <b>I</b> Y <b>R</b> H <b>F</b> D <b>R</b> H <b>A</b> L <b>E</b> | 300 |
| CDKC;1 301 | <b>L</b> L <b>E</b> K <b>M</b> L <b>V</b> L <b>D</b> P <b>A</b> Q <b>R</b> I <b>S</b> A <b>K</b> D <b>A</b> L <b>D</b> A <b>E</b> Y <b>F</b> W <b>T</b> D <b>P</b> L <b>P</b> C <b>D</b> P <b>K</b> S <b>L</b> P <b>T</b> Y <b>E</b> S <b>S</b> H <b>E</b> F <b>Q</b> T <b>K</b> K <b>R</b> Q <b>Q</b> R <b>O</b> N <b>E</b> E          | 360 |
| CDKC;2 301 | <b>L</b> L <b>E</b> K <b>M</b> L <b>V</b> L <b>D</b> P <b>S</b> Q <b>R</b> I <b>C</b> A <b>K</b> D <b>A</b> L <b>D</b> A <b>E</b> Y <b>F</b> W <b>T</b> D <b>P</b> L <b>P</b> C <b>D</b> P <b>K</b> S <b>L</b> P <b>T</b> Y <b>E</b> S <b>S</b> H <b>E</b> F <b>Q</b> T <b>K</b> K <b>R</b> Q <b>Q</b> M <b>R</b> H <b>N</b> E <b>E</b> | 360 |
| CDKC;1 361 | <b>A</b> A <b>K</b> R <b>Q</b> K <b>L</b> Q <b>H</b> P <b>L</b> Q <b>H</b> S <b>R</b> L <b>P</b> L <b>Q</b> H <b>G</b> - <b>G</b> Q <b>S</b> H <b>A</b> A <b>P</b> H <b>W</b> P <b>A</b> G <b>P</b> N <b>H</b> P <b>T</b> N <b>N</b> A-- <b>P</b> P <b>Q</b> V <b>P</b> A <b>G</b> P <b>S</b> H <b>N</b> F <b>Y</b> G                   | 417 |
| CDKC;2 361 | <b>A</b> A <b>K</b> R <b>Q</b> K <b>L</b> Q <b>H</b> P <b>Q</b> Q <b>H</b> S <b>R</b> L <b>P</b> P <b>Q</b> H <b>G</b> V <b>G</b> Q <b>S</b> H <b>A</b> A <b>P</b> L <b>W</b> P <b>A</b> G <b>P</b> N <b>H</b> P <b>M</b> N <b>N</b> A <b>P</b> P <b>Q</b> I <b>P</b> A <b>G</b> - <b>G</b> H <b>Y</b> Y <b>G</b> G                     | 419 |
| CDKC;1 418 | <b>K</b> P <b>R</b> - <b>G</b> P <b>P</b> G <b>P</b> N <b>R</b> Y <b>P</b> P <b>S</b> G <b>N</b> Q <b>S</b> G <b>G</b> Y-N <b>Q</b> S <b>R</b> G <b>G</b> Y <b>S</b> S <b>G</b> S <b>Y</b> P <b>P</b> Q <b>G</b> R <b>G</b> A <b>P</b> Y <b>V</b> A <b>G</b> P <b>R</b> G <b>P</b> S <b>G</b> G <b>P</b> Y <b>G</b> V <b>G</b> P        | 475 |
| CDKC;2 420 | <b>K</b> P <b>R</b> G <b>A</b> P <b>V</b> P <b>N</b> R <b>Y</b> P <b>P</b> S <b>G</b> N <b>Q</b> T <b>G</b> G <b>Y</b> N <b>Q</b> S <b>R</b> G <b>G</b> Y <b>S</b> S <b>G</b> A <b>Y</b> P <b>P</b> Q <b>G</b> R <b>G</b> A <b>P</b> Y <b>G</b> A <b>G</b> P <b>R</b> G <b>P</b> S <b>G</b> G <b>-Y</b> V <b>G</b> V <b>P</b>           | 478 |
| CDKC;1 476 | <b>P</b> N <b>Y</b> T <b>Q</b> G <b>G</b> Q <b>Y</b> G <b>G</b> S <b>G</b> S <b>S</b> G <b>R</b> G <b>Q</b> N <b>Q</b> ----- <b>R</b> N <b>Q</b> Q <b>Y</b> G <b>W</b> Q                                                                                                                                                                | 504 |
| CDKC;2 479 | <b>P</b> N <b>Y</b> S <b>Q</b> G <b>G</b> Q <b>Y</b> G <b>G</b> S <b>G</b> S <b>S</b> G <b>R</b> G <b>Q</b> N <b>P</b> M <b>G</b> G <b>A</b> R <b>N</b> Q <b>Q</b> Y <b>G</b> W <b>Q</b>                                                                                                                                                | 512 |

Fig. S4. Amino acid sequence alignments. (A) Alignments of CDK9 homologs. Conserved residues are highlighted in yellow. (B) Alignment of CDKC;2 and CDKC;1 from *Arabidopsis*. Identical residues are highlighted in red.

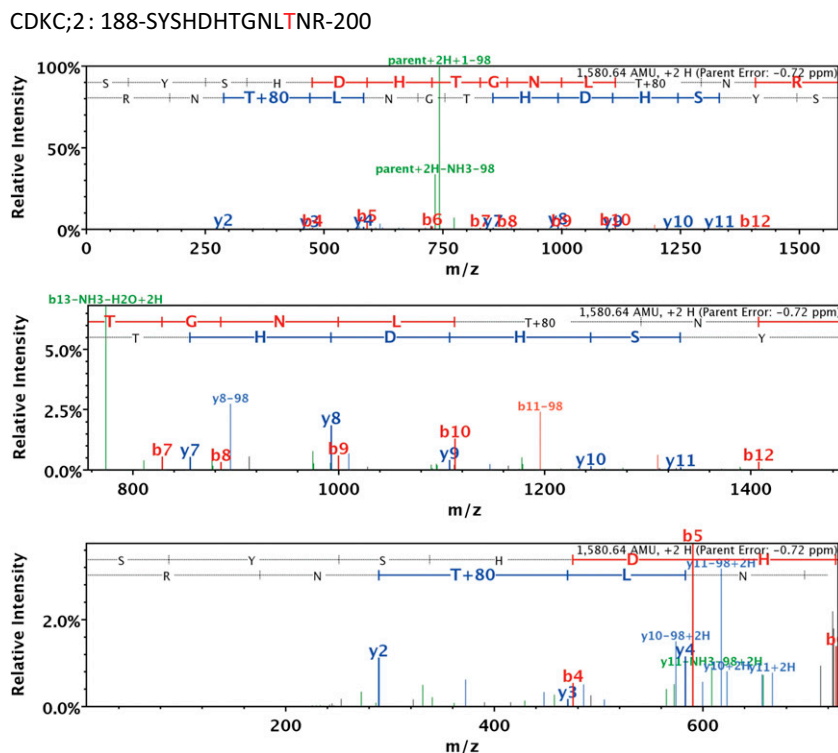

Fig. S5. T198 was found to be phosphorylated. The peak b11-98 shows clearly that the T is phosphorylated. The differences b12 – b10 and y3 – y2 also show that the T is phosphorylated.

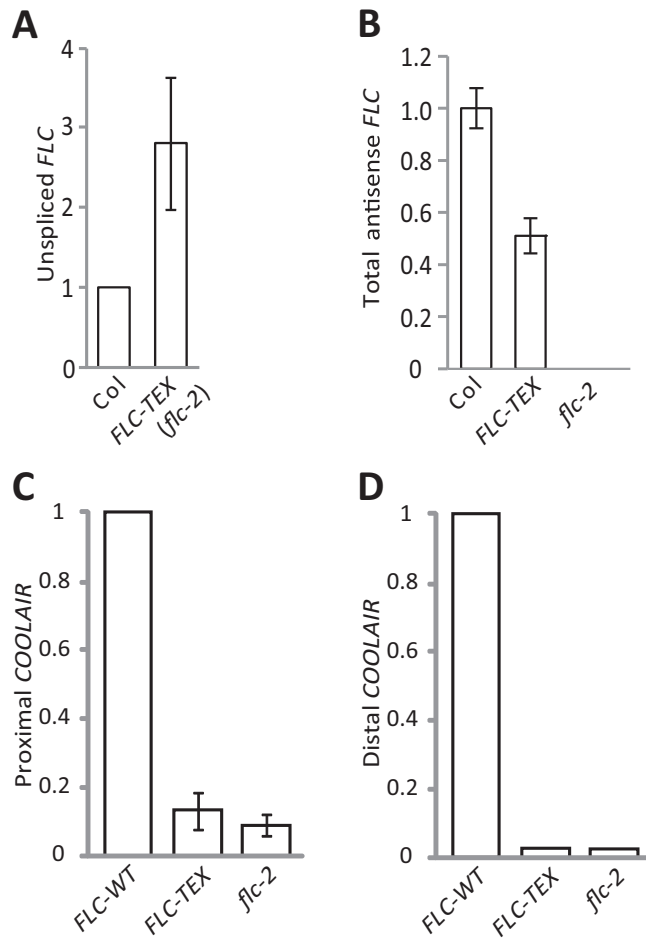

**Fig. 56.** (A) Unspliced *FLC* analysis by qRT-PCR. (B) Total antisense *FLC* level in wild type, *FLC-TEX flc-2*, and *flc-2*. (C) Proximal polyadenylated *COOLAIR* level in wild type, *FLC-TEX flc-2*, and *flc-2* by qRT-PCR analysis. (D) Distal polyadenylated *COOLAIR* level in wild type, *FLC-TEX flc-2*, and *flc-2* by qRT-PCR analysis. (C and D) These three genotypes contain an active *FRIGIDA* allele. Error bars represent SEM derived from three biological repeats.

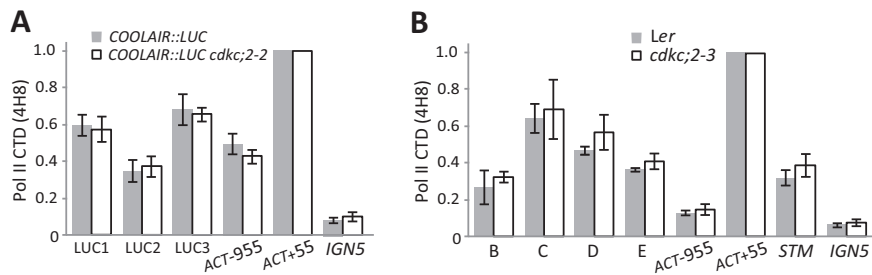

**Fig. 57.** (A) ChIP experiments assaying RNA Pol II (using anti-CTD-4H8) in *COOLAIR::LUC* regions in *cdkc;2-2* and Col. (B) ChIP experiments assaying RNA Pol II (using anti-CTD-4H8) in *FLC* regions in *cdkc;2-3* and Ler. Values are means  $\pm$  SEM from two biological repeats; data were presented as ratio of (Pol II *FLC*/input *FLC*) to (Pol II *Actin*/input *Actin*). *Actin*, *STM*, and *IGN5* were used as the internal control for the ChIP experiments.

Table S1. List of primers

| Primer name        | Sequence                          | Purpose                                                                |
|--------------------|-----------------------------------|------------------------------------------------------------------------|
| RLfca9             | TCTTTGGCTCAGCAAACC                | dCAPS marker for <i>fca-9</i> (Styl)                                   |
| GSO379             | TGTTGAGATGGTGAACCTGTG             |                                                                        |
| FLD-4.5            | AGCTAGGCAACTGATGAG                | Genotyping wild type <i>FLD</i>                                        |
| FLD-4.3            | AGAAACCTGCCTGAATGTC               |                                                                        |
| SALK_029546CL      | CGTTGGAGTCCACGTTCTTT              | Genotyping <i>fld-4</i>                                                |
| fld-4-5-2          | TTATATCCAAATGGCGAGAAAAAT          |                                                                        |
| (FY-) F17          | AAACAGCCTCTTCCAGGTTCC             | Genotyping wild type <i>FY</i>                                         |
| (FY-) FY4          | CTGTTGGAAAGGGTTGTTGTAGCCTGGAATC   |                                                                        |
| BL3(RDR2-1.3)14-E5 | TAGCATCTGAATTCATAACCAATCTCGATACAC | Genotyping <i>fy-2</i>                                                 |
| (FY-) FY4          | CTGTTGGAAAGGGTTGTTGTAGCCTGGAATC   |                                                                        |
| GSO420             | GCGACAAAACCTTGTTCATAAAAGC         | dCAPS marker for <i>fy-1</i> (HindIII)                                 |
| GSO421             | AACTCAGACCCAAGTACTCGG             |                                                                        |
| sof77Psil L        | ATATTCCTCATGATCATACTGGAACCTTA     | dCAPS marker for <i>cdk;2-3</i> (Psil)                                 |
| sof77Psil R        | TCAATCGCTGGTCCATATTTAGT           |                                                                        |
| CDKC;2 3 F         | TGCTTATACGTGCAGCTTTTTTC           | Genotyping wild type <i>CDKC;2</i>                                     |
| CDKC;2 3 R         | TAACTCCACGGCTCTGATT               |                                                                        |
| SALK_029546CL      | CGTTGGAGTCCACGTTCTTT              | Genotyping wild type <i>cdk;2-2</i>                                    |
| SALK_029546C R     | CAGGTGATCCACAAAGCTCA              |                                                                        |
| TE-CHECK-F         | TCATCATGTGGGAGCAGAAG              | Genotyping <i>FLC-TEX</i>                                              |
| RBCS3-5-AII        | GTTAATATTAACCTAGGAACCTACACGC      |                                                                        |
| LUC 2F             | GAGGTTCCATCTGCCAGGTA              | Genotyping <i>LUC</i>                                                  |
| LUC 2R             | CGCTTCCGGATTGTTTACAT              |                                                                        |
| UJ43               | GAAGATCATCGAATTGGC                | Genotyping transgene <i>FRI</i> in <i>Ler</i> background               |
| CLFRI-10           | CATGTCGTAATCATGCAAC               |                                                                        |
| RLFCA3             | CCTATTCCGAACAGCATGG               | Genotyping transgene <i>FCA</i>                                        |
| RLFCA9             | TCTTTGGCTCAGCAAACC                |                                                                        |
| Sense FLC ex3 LP   | CGCAATTTTCATAGCCCTTG              | Real-time PCR for nascent <i>FLC</i>                                   |
| Sense FLC ex3 RP   | CTTTGTAATCAAAGGTGGAGAGC           |                                                                        |
| FLC cDNA 393F      | AGCCAAGAAGACCGAACTCA              | Real-time PCR for <i>FLC</i> mRNA                                      |
| FLC cDNA 550R      | TTTGTCCAGCAGGTGACATC              |                                                                        |
| polyA set1 LP      | TTTTTTTTTTTTTTTACTGCTTCCA         | Real-time PCR for proximal pA from antisense <i>FLC</i>                |
| set1 RP            | CACACCACCAATAACAACCA              |                                                                        |
| polyA set4 LP      | TTTTTTTTTTTTTTTGGGTACAC           | Real-time PCR for distal pA from antisense <i>FLC</i>                  |
| set4 RP            | GGGGTAAACGAGAGTGATGC              |                                                                        |
| set6 new LP        | TGATGTGTTCTTCACTTCTGTCAA          | Real-time PCR for total antisense <i>FLC</i>                           |
| set6 new RP        | GCCGTAGGCTTCTCACTGT               |                                                                        |
| DTA-LP             | GTATCTCCGGCGACTTGAAC              | Real-time PCR for measure total antisense <i>FLC</i> in <i>FLC-TEX</i> |
| DTA-RP             | GGATGCGTCCAGAGAACAG               |                                                                        |
| DTA-RT             | AATATCTGGCCCGACGAAG               | RT primer for measure total antisense <i>FLC</i> in <i>FLC-TEX</i>     |
| Q RBCS R-2         | ACAATAGGAAATGAAATGAGCAG           | RT for transgenic <i>FLC</i> in <i>FLC-TEX</i>                         |
| Q Un FLC endor F   | TTAATGGTTGTTATTGGTGG              | Real-time PCR for transgenic <i>FLC</i> in <i>FLC-TEX</i>              |
| Q RBCS R-1         | TCATAAGAATGTTACCGGTTTC            |                                                                        |
| VC139-UJ26-FRI     | AGATTTGCTGGATTTGATAAGG            | Genotyping active <i>FRI</i> in <i>Col</i> background                  |
| VC140-UJ34-FRI     | ATATTTGATGTGCTCTCC                |                                                                        |
| <i>FLC</i> -4875 F | AAGCATGAGGGACCAATCTG              | Genotyping <i>flc-2</i>                                                |
| <i>FLC</i> -4651 R | CCAAACCAGAACTGACAACG              |                                                                        |
| Q PCR LUC F        | TTCATCTGCCAGGTATCAG               | Real-time PCR for <i>LUC</i>                                           |
| Q PCR LUC R        | ATCCAGATCCACAACCTTCG              |                                                                        |
| <i>cstf64.f7</i>   | ATTTCAGATTAGTTACGGATAGAGA         | dCAPS marker for <i>cstf64-1</i> (Hpy188I digests wild type)           |
| <i>cstf64.R2</i>   | ACGGGTTTTGTCAGTGC                 |                                                                        |
| <i>FLC</i> -501 F  | ACTATGTAGGCACGACTTTGGTAAC         | ChIP primers for the <i>FLC</i> gene region A                          |
| <i>FLC</i> -381 R  | TGCAGAAAGAACCTCCACTCTAC           |                                                                        |
| <i>FLC</i> 157 F   | CGACAAGTCACCTTCTCCAAA             | ChIP primers for the <i>FLC</i> gene region B                          |
| <i>FLC</i> 314 R   | AGGGGAACAAATGAAAACC               |                                                                        |
| <i>FLC</i> 438 F   | GGCGGATCTCTGTTGTTTC               | ChIP primers for the <i>FLC</i> gene region C                          |
| <i>FLC</i> 502 R   | CTTCTTCACGACATTTGTTCTTCC          |                                                                        |
| <i>FLC</i> 1533 F  | TTGACAAATCCACAACCTCAATC           | ChIP primers for the <i>FLC</i> gene region D                          |
| <i>FLC</i> 1670 R  | TCAATTTCTAGAGGCACCAA              |                                                                        |
| <i>FLC</i> 1884 F  | AGCCTTTTAGAACGTGGAACC             | ChIP primers for the <i>FLC</i> gene region E                          |
| <i>FLC</i> 2062 R  | TCTTCCATAGAAGGAAGCGACT            |                                                                        |

Table S1. Cont.

| Primer name       | Sequence                        | Purpose                                                              |
|-------------------|---------------------------------|----------------------------------------------------------------------|
| FLC 3088 F        | GGGGCTGCGTTTACATTTTA            | ChIP primers for the <i>FLC</i> gene region F                        |
| FLC 3224 R        | GTGATAGCGCTGGCTTTGAT            |                                                                      |
| FLC 3899 F        | CTTTTTTCATGGGCAGGATCA           | ChIP primers for the <i>FLC</i> gene region G                        |
| FLC 4069 R        | TGACATTTGATCCCACAAGC            |                                                                      |
| FLC set1 polyA.aL | AGATTATAGATACTGCTTCCAAACT       | ChIP primers for the <i>FLC</i> gene region H                        |
| FLC set1 polyA.aR | TTCACACCACCAAATAACAAC           |                                                                      |
| FLC 5534F         | TGGTTGTTATTGGTGGTGTG            | ChIP primers for the <i>FLC</i> gene region J                        |
| FLC 5649 R        | ATCTCCATCTCAGCTTCTGCTC          |                                                                      |
| FLC 5948 F        | CGTGTGAGAATTGCATCGAG            | ChIP primers for the <i>FLC</i> gene region U                        |
| FLC 6066 R        | AAAAACGCCAGAGAGAGAG             |                                                                      |
| FLC 6768 F        | TTGTAAAGTCCGATGGAGACG           | ChIP primers for the <i>FLC</i> gene region V                        |
| FLC 6838 R        | ACTCGGCGAGAAAGTTGTG             |                                                                      |
| LUC1-F            | TCAACCGCGATTTAAGGT              | ChIP primers for the <i>COOLAIR::LUC</i> gene region LUC1            |
| LUC1-R            | CGCTGATCAATTCCACAGTTT           |                                                                      |
| LUC2-F            | AGAGATACGCCCTGGTTCCT            | ChIP primers for the <i>COOLAIR::LUC</i> gene region LUC2            |
| LUC2-R            | ATAAATAACGCCCAACAC              |                                                                      |
| LUC3-F            | GTTCCATCTGCCAGGTATCA            | ChIP primers for the <i>COOLAIR::LUC</i> gene region LUC3            |
| LUC3-R            | CCGGTATCCAGATCCACAAC            |                                                                      |
| Actin -995-F      | TGGGTCTCATATAGAACAACCTCACAAAGGT | ChIP primers measure promoter of Actin7 as low                       |
| Actin -832-R      | GACCAAAACCCGAATAGGAGCAAGA       | expression reference                                                 |
| Actin-55-F        | CGTTTCGCTTTTCCTTAGTGTTAGCT      | ChIP primers measure the region at the beginning of                  |
| Actin-188-R       | AGCGAACGGATCTAGAGACTCACCTTG     | Actin7, as high expression reference for ChIP                        |
|                   |                                 | data normalization.                                                  |
| IGN5-set3-F       | CCCTTAAGCGGACATGGTT             | ChIP primers for IGN5 as reference gene which is not a Pol II target |
| IGN5-set3-R       | AATGTCGGCCAATCTTCTTG            |                                                                      |
| STM-F             | GCCCATCATGACATCACATC            | ChIP primers for STM as low expression reference gene.               |
| STM-R             | GGGAACACTTTGTTGGTGGTG           |                                                                      |
